# Supplementary material for: The tuned Schottky barrier of a CoP co-catalyst via the bridge of ohmic contact from molybdenum metal for enhanced photocatalytic hydrogen evolution
Source: Royal Society of Chemistry journal article supplement (doi:10.1039/d4ta05877a), 2024-01-01
Supplement: d4ta05877a1.pdf [file d4ta05877a1.pdf]

## Supplementary Material

**Tuned Schottky barrier of CoP co-catalyst via the bridge of ohmic contact form**

**Mo metal for enhanced photocatalytic hydrogen evolution**

Ying-jie Sun<sup>‡</sup>, Xue-ting Liu<sup>‡</sup>, Xin-jie Zhao, Xiao-jing Wang\*, Jun Zhao, Yu-pei Li,

Hui-ying Mu, Fa-tang Li\*

Hebei Key Laboratory of Photoelectric Control on Surface and Interface, College of  
Science, Hebei University of Science and Technology, Shijiazhuang, 050018, China

<sup>‡</sup> These authors contributed equally to this work

---

\* Corresponding authors. E-mail: [propyl@163.com](mailto:propyl@163.com) (Xiao-jing Wang) and [lifatang@126.com](mailto:lifatang@126.com) (Fa-tang Li)

## **S1. Characterization**

The crystal structures of the samples were characterized using an X-ray powder diffractometer (Rigaku D/Max 2500). The microstructure and morphology of the samples were recorded by transmission electron microscopy (TEM, JEOL JEM-2100) and scanning electron microscopy (SEM, Hitachi S-4800). High resolution transmission electron microscopy (HRTEM, FEI Talos F200S) was used to test the composition and crystal structure of the samples. The composition, chemical states and valence bands of the elements were tested using X-ray photoelectron spectroscopy (XPS, PHI 1600 ESCA). Photoluminescence (PL) measurements were performed on a fluorescence spectrophotometer (Hitachi F-4600) with an excitation wavelength of 340 nm. The light absorption properties of the samples were tested using an ultraviolet visible (UV-Vis) diffuse reflection spectrophotometer (Thermo Scientific Evolution 220). The Ultraviolet Photoelectron Spectroscopy (UPS) of samples was recorded by (Thermo ESCALAB 250XI). The molecular structure information was conducted on a Raman spectrometer (KL325) with 325 nm excitation wavelength. The element content of the samples was obtained using an inductively coupled plasma atomic emission spectroscopy instrument (Thermo Scientific iCAP 6300), and 0.1 g of the samples were pretreated using 5 mol/L HNO<sub>3</sub> and diluted before measurement.

## **S2. Electrochemical test**

The photoelectrochemical and electrochemical measurements were carried out by Chenhua CHI 660E electrochemical workstation. In electrochemical testing, a standard three electrode system was used. The FTO coated with catalyst serves as the working electrode, Pt sheet acts as the counter electrode and Ag/AgCl (3mol/L KCl) is used as reference electrode in a Na<sub>2</sub>SO<sub>4</sub> electrolyte (0.2 mol/L). A 300 W xenon lamp with a 400 nm cutoff plate is used as the light source for the photocurrent test. Mott-Schottky analyses were performed in the similar electrochemical configuration of the photocurrent tests without light irradiation. The working electrode was prepared by the following method: 4 mg of the powder sample was dispersed into a mixture of 480 μL deionized water, 480 μL ethanol and 40 μL 5% Nafion solution, and then the solution was evenly dispersed by ultrasonic. Then the 30μl solution was dropped on a clean FTO

conductive glass slice with an area of  $1.0 \text{ cm}^2$ , and dried in an oven at  $80^\circ\text{C}$  for further use.

### **S3. Calculation method**

First-principles calculations are performed by using density functional theory (DFT) implemented in Vienna Ab-initio Simulation Package (VASP).<sup>1</sup> Projector augmented-wave (PAW) pseudopotential is used to account ion-electron interactions.<sup>2</sup> The correlation and exchange terms are described using general gradient approximation (GGA) in the scheme of Perdew–Burke–Ernzerh (PBE) functional.<sup>3</sup> For the surface construction, the g- $\text{C}_3\text{N}_4(001)$ ,  $\text{CoP}(002)$  and  $\text{Mo} (110)$  surface is cleaved. During the calculation of charge density difference, a slab model consisted of a crystal (002) face of  $\text{CoP}$  and (110) plane of  $\text{Mo}$  was established to represent the contact surface between anatase  $\text{CoP}$  and  $\text{Mo}$ . The vacuum separation larger than  $15 \text{ \AA}$  is employed in order to eliminate interactions between two adjacent unit cell. During all calculations, the kinetic energy cutoff of  $500 \text{ eV}$  is used, and the convergence criteria for energy and force are  $10^{-5} \text{ eV}$  and  $0.03 \text{ eV/\AA}$ , respectively.

### **S4. Photocatalytic activity tests**

The photocatalytic HER activity of the samples was determined by side irradiation of a 300w Xenon lamp with a 400nm cut-off filter in a self-made quartz reactor under continuous agitation conditions. Generally, 30 mg of photocatalyst sample is added to 30 ml of triethanolamine (TEOA) (20%) aqueous solution as a sacrificial agent. The reaction temperature is constant at  $20^\circ\text{C}$ , and Ar is used as the carrier gas. The hydrogen production is analyzed by gas chromatography every hour. (Techcomp GC7900, thermal conductivity detector).

The apparent quantum yield (AQY) was tested in a 250 mL quartz top irradiation reactor. Typically, 100 mg of the catalyst, 80 mL of deionized water and 20 mL of triethanolamine were added to the quartz reactor. Other conditions were the same as the photocatalytic experiment except the cut-off filter of the Xe-lamp was change to a  $420 \pm 20 \text{ nm}$  band-pass filter. The effective irradiation area was  $19.6 \text{ cm}^2$ , the average light intensity was  $5.4 \text{ mW}\cdot\text{cm}^{-2}$  and the irradiation time is 10800s. The AQY was calculated based on the following formula (1):<sup>25</sup>

$$\text{AQY}(\%) = \frac{\text{Number of reacted electrons}}{\text{Number of incident photons}} \times 100\% = \frac{\text{Number of evolved H}_2 \text{ molecules} \times 2}{\text{Number of incident photons}} \times 100\%$$

(1)

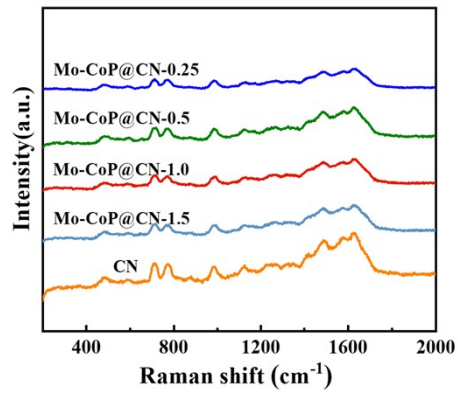

Fig. S1 Raman spectra CN and Mo-CoP@CN composites.

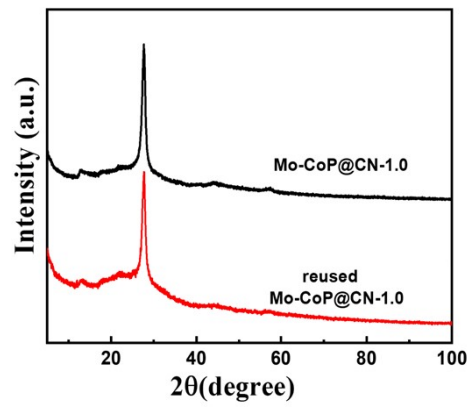

Fig. S2 XRD patterns of Mo-CoP@CN-1.0 before and after recycling.

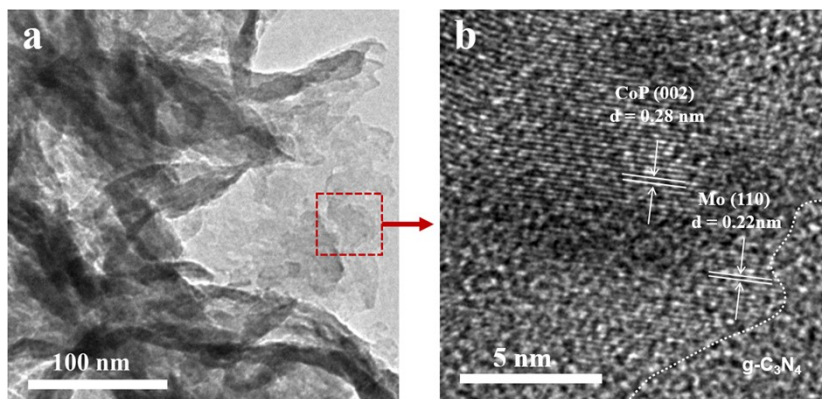

Fig. S3 (a) TEM and (b) HRTEM images of the reused Mo-CoP@CN-1.0

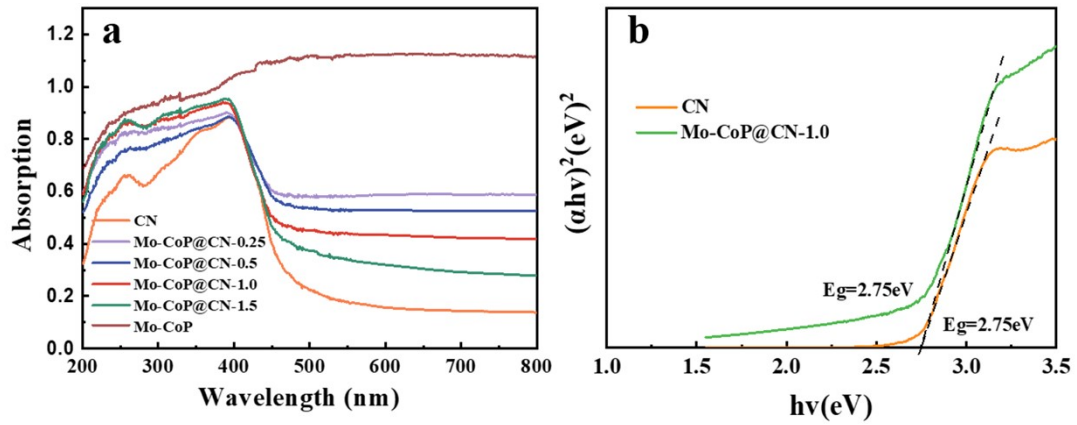

Fig. S4 (a) UV-visible diffuse reflection spectra of different samples (b) Kubelka-Munk function transformation spectra

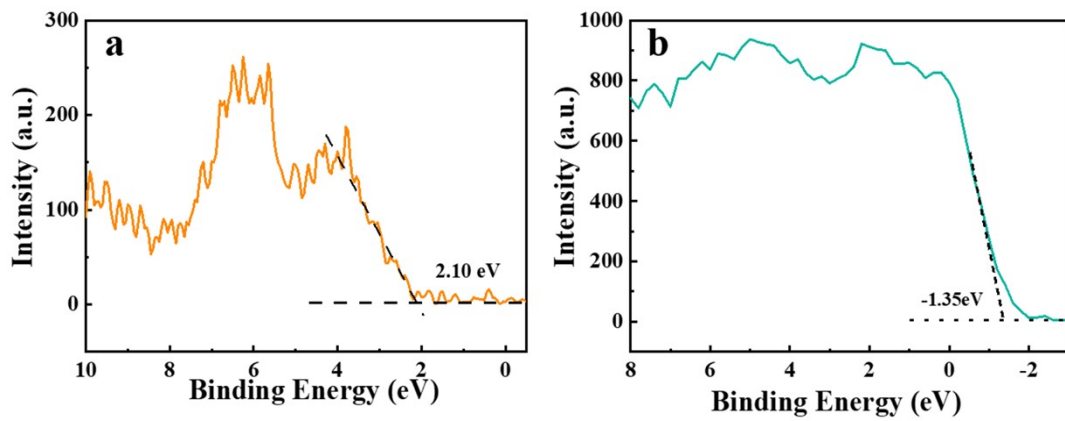

Fig. S5 XPS valence band spectra (a) CN (b) Mo-CoP

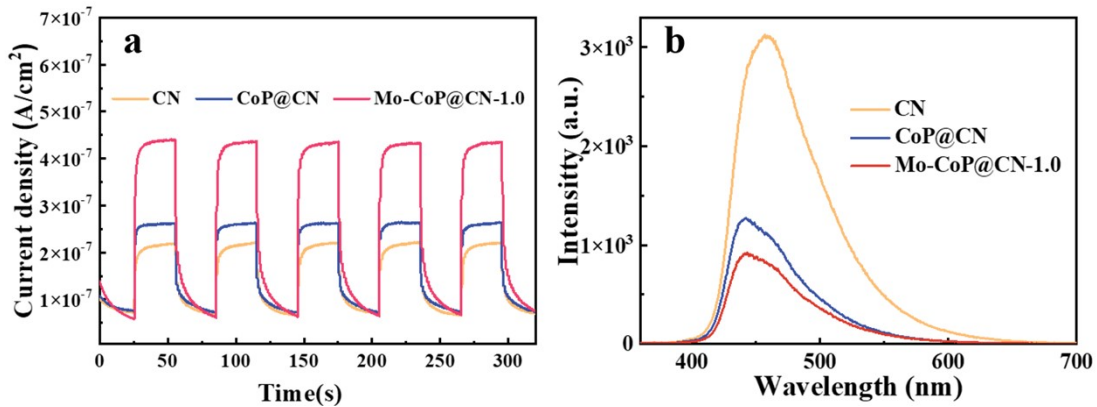

Fig. S6 (a) photocurrent test (b) PL spectrum of CN, CoP@CN, Mo-CoP@CN-1.0.

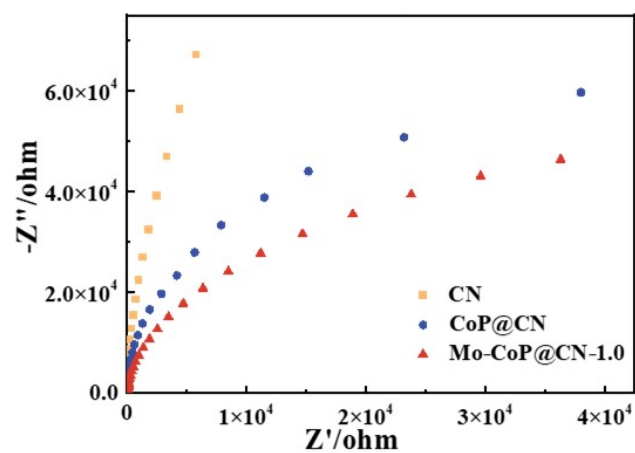

Fig. S7 Electrochemical impedance of CN, CoP@CN, Mo-CoP@CN-1.0.

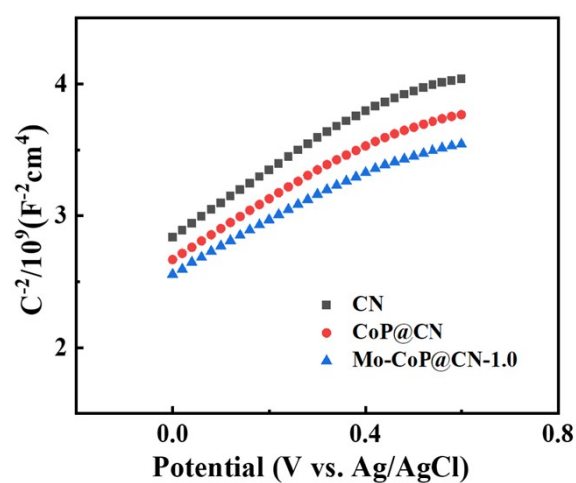

Fig. S8 MS plots of CN, CoP@CN, Mo-CoP@CN-1.0.

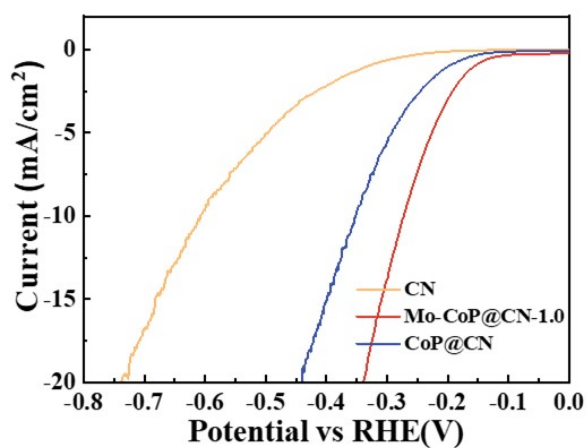

Fig. S9 LSV polarization curve of CN, CoP@CN, Mo-CoP@CN-1.0.

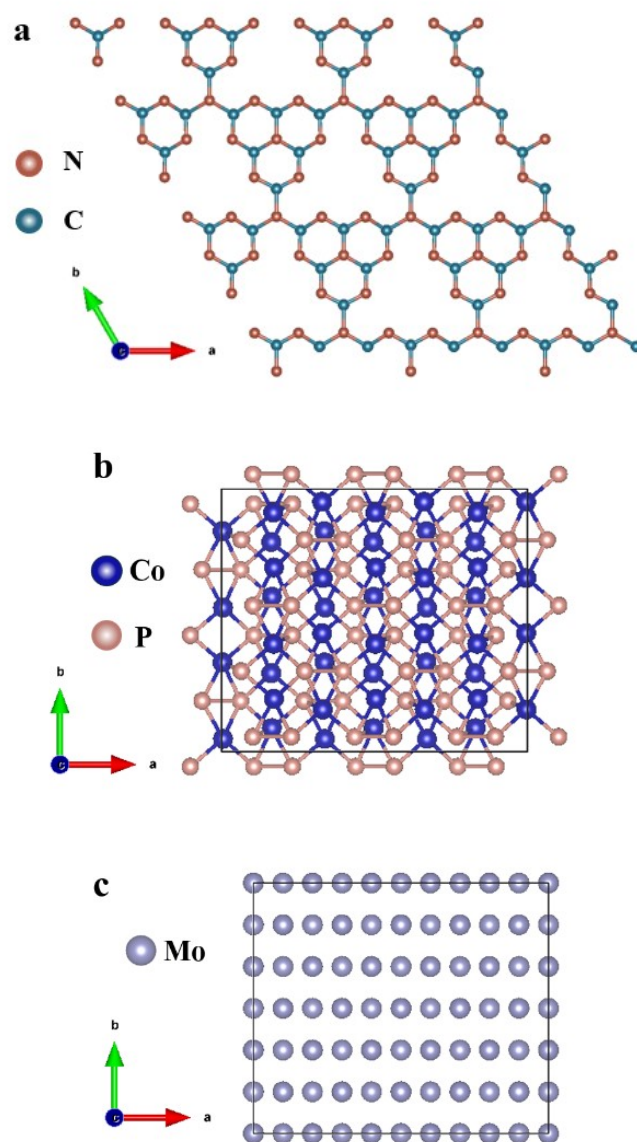

Fig. S10 The crystal structure of (a) g-C<sub>3</sub>N<sub>4</sub>, (b)CoP, (c) Metal Mo.



Table S1. The Mo, Co and P contents of the as prepared Mo/CoP samples detected by ICP-AES.

| Sample      | Mo content<br>wt% | Co content<br>wt% | P content<br>wt% | Mo/Co/P<br>molar ratio |
|-------------|-------------------|-------------------|------------------|------------------------|
| Mo/CoP -0.5 | 17                | 53                | 30               | 1.0/5.0/5.4            |
| Mo/CoP -1   | 26                | 46                | 28               | 1.0/2.8/3.3            |
| Mo/CoP -1.5 | 38                | 40                | 22               | 1.0/1.7/1.8            |

Table S2 The performance comparison of the catalysts from the different references.

| Photocatalyst                                                       | Light                           | Sacrificial agent | Rate of H <sub>2</sub> Evolution<br>( $\mu\text{mol}\cdot\text{g}^{-1}\cdot\text{h}^{-1}$ ) | AQE at 420 nm | Ref.      |
|---------------------------------------------------------------------|---------------------------------|-------------------|---------------------------------------------------------------------------------------------|---------------|-----------|
| Mo-CoP@CN                                                           | Xe 300 W,<br>$\lambda > 400$ nm | 10%TEOA           | 1470                                                                                        | 5.39%         | This work |
| Ni/g-C <sub>3</sub> N <sub>4</sub>                                  | Hg 500 W                        | 10% methanol      | 270                                                                                         | —             | 4         |
| NiS/g-C <sub>3</sub> N <sub>4</sub>                                 | LED 3W,<br>$\lambda = 420$ nm   | 10% TEOA          | 244                                                                                         | —             | 5         |
| Ni <sub>3</sub> C@Ni/g-C <sub>3</sub> N <sub>4</sub>                | Xe 300W,<br>$\lambda > 420$ nm  | 15% TEOA          | 11.28                                                                                       | 1.49%         | 6         |
| NC-Co <sub>3</sub> W <sub>3</sub> C@g-C <sub>3</sub> N <sub>4</sub> | Xe 300 W,<br>$\lambda = 400$ nm | 15% TEOA          | 1332                                                                                        | 5.12%         | 7         |
| MoO <sub>2</sub> /Ni <sub>2</sub> P@g-C <sub>3</sub> N <sub>4</sub> | Xe 300 W,<br>$\lambda > 400$ nm | 10% TEOA          | 617.2                                                                                       | 2.13%         | 8         |
| UCN-200                                                             | Xe 300 W<br>$\lambda > 420$ nm  | 10% TEOA          | 1254.75                                                                                     | —             | 9         |
| CuInS <sub>2</sub> /g-C <sub>3</sub> N <sub>4</sub>                 | Xe 350 W,<br>$\lambda = 365$ nm | 10% TEOA          | 102.4                                                                                       | —             | 10        |
| Ni <sub>x</sub> Co <sub>1-x</sub> P/rGO/CN                          | Xe 300 W,<br>$\lambda > 420$ nm | PLA               | 576.7                                                                                       | 1.7%          | 11        |
| OH-HCNMS                                                            | Xe 300 W,<br>$\lambda = 420$ nm | 10% TEOA          | 328.9                                                                                       | 3.7%          | 12        |
| Pt SAs/C <sub>3</sub> N <sub>4</sub>                                | Xe 300 W                        | 20% TEOA          | 573.6                                                                                       | —             | 13        |
| Ag <sub>2</sub> S QDs/g-C <sub>3</sub> N <sub>4</sub>               | Xe 300 W,<br>$\lambda > 420$ nm | 20% TEOA          | 471.1                                                                                       | 0.82%         | 14        |
| Co <sub>3</sub> O <sub>4</sub> /g-C <sub>3</sub> N <sub>4</sub>     | Xe 300 W,<br>$\lambda = 420$ nm | 15% TEOA          | 105.06                                                                                      | 0.053%        | 15        |
| CoS <sub>2</sub> /S/g-C <sub>3</sub> N <sub>4</sub>                 | Xe 300 W,<br>$\lambda > 420$ nm | 10% TEOA          | 577.5                                                                                       | 1.08%         | 16        |

## References

1. G. Kresse and J. Furthmüller, Efficiency of Ab-initio total energy calculations for metals and semiconductors using a plane-wave basis set. *Comput. Mater. Sci.*, 1996, 6, 15-50.
2. G. Kresse and D. Joubert, From ultrasoft pseudopotentials to the projector

- augmented-wave method. *Phys. Rev. B*, 1999, 59, 1758-1775.
3. J. P. Perdew, K. Burke and M. Ernzerhof, Generalized gradient approximation made simple. *Phys. Rev. Lett.*, 1996, 77, 3865-3868.
  4. M. Ismael, One-step ultrasonic-assisted synthesis of Ni-doped g-C<sub>3</sub>N<sub>4</sub> photocatalyst for enhanced photocatalytic hydrogen evolution. *Inorg. Chem. Commun.*, 2023, 15, 110607.
  5. M. Wang, J. Cheng, X. Wang, X. Hong, J. Fan and H. Yu, Sulfur-mediated photodeposition synthesis of NiS cocatalyst for boosting H<sub>2</sub>-evolution performance of g-C<sub>3</sub>N<sub>4</sub> photocatalyst. *Chin. J. Catal.*, 2021, 42(1): 37-45.
  6. R. Shen, K. He, Zhang A, N. Li, Y. H. Ng, P. Zhang, J. Hu and X. Li, In-situ construction of metallic Ni<sub>3</sub>C@Ni Core-Shell cocatalysts over g-C<sub>3</sub>N<sub>4</sub> nanosheets for shell-thickness-dependent photocatalytic H<sub>2</sub> production. *Appl. Catal. B: Environ.*, 2021, 291: 120104.
  7. X. Zhou, J. Luo, B. Jin, Z. Wu, S. Yang, S. Zhang, Y. Tian, Y. Fang, Y. Hou and X. Zhou, Sustainable synthesis of low-cost nitrogen-doped-carbon coated Co<sub>3</sub>W<sub>3</sub>C@g-C<sub>3</sub>N<sub>4</sub> composite photocatalyst for efficient hydrogen evolution. *Chem. Eng. J.*, 2021, 426 (2): 131208.
  8. X.T. Liu, B. H. Li, X. J. Wang, Y. L. Li, J. Zhao, Y. P. Li, and F. T. Li, Enhanced schottky effect in the Ni<sub>2</sub>P cocatalyst via work function up-shift induced by MoO<sub>2</sub> for boosting photocatalytic hydrogen evolution. *ACS Sustainable Chem. Eng.* 2022, 10, 10627–10640
  9. L. Chen, X. Liang, H. Wang, Q. Xiao and X. Qiu, Ultra-thin carbon nitride nanosheets for efficient photocatalytic hydrogen evolution. *Chem. Eng. J.*, 2022, 442, 136115.
  10. J. Zhang, Y. Zhao, K. Qi and S.Y. Liu, CuInS<sub>2</sub> quantum-dot-modified g-C<sub>3</sub>N<sub>4</sub> S-scheme heterojunction photocatalyst for hydrogen production and tetracycline degradation. *J. Mater. Sci. Technol.*, 2024, 172,145-155.
  11. J. Yan, D. Sun and J. Huang, Synergistic poly (lactic acid) photoreforming and H<sub>2</sub> generation over ternary Ni<sub>x</sub>Co<sub>1-x</sub>P/reduced graphene oxide/g-C<sub>3</sub>N<sub>4</sub> composite. *Chemosphere*, 2022, 286: 131905.

12. S. Wang, X. Zhao, X. Zhao, J. Zhang, Z. Ao, P. Dong, F. He, H. Wu, X. Xu, L. Shi, C. Zhao, S. Wang and H. Sun, Surface engineering of hollow carbon nitride microspheres for efficient photoredox catalysis. *Chem. Eng. J.*, 2020, 381, 122593.
13. Y. Hu, Y. Qu, Y. Zhou, Z. Wang, H. Wang, B. Yang, Z. Yu, Y. Wu, Single Pt atom-anchored C<sub>3</sub>N<sub>4</sub>: A bridging Pt-N bond boosted electron transfer for highly efficient photocatalytic H<sub>2</sub> generation. *Chem. Eng. J.*, 2021, 412, 128749.
14. Z. You, X. Yue, D. Zhang, J. Fan and Q. Xiang, Construction 0D/2D heterojunction by highly dispersed Ag<sub>2</sub>S quantum dots (QDs) loaded on the g-C<sub>3</sub>N<sub>4</sub> nanosheets for photocatalytic hydrogen evolution. *J. Colloid. Interf. Sci.*, 2022, 607, 662-675.
15. Z. Xu, J. Zhong, J. Chen, M. Li, L. Zeng and H. Yang, Construction of S-scheme Co<sub>3</sub>O<sub>4</sub>/g-C<sub>3</sub>N<sub>4</sub> heterojunctions with boosted photocatalytic H<sub>2</sub> production performance. *Surf. Interf.*, 2023, 38, 102838.
16. Y. Z. Zhang, J. W. Shi, Z. X. Huang, X. J. Guan, S. C. Zong, C. Cheng, B. T. Zheng and L. J. Guo, Synchronous construction of CoS<sub>2</sub> in-situ loading and S doping for g-C<sub>3</sub>N<sub>4</sub>: Enhanced photocatalytic H<sub>2</sub>-evolution activity and mechanism insight. *Chem. Eng. J.*, 2020, 401, 26135.
